# Supplementary material
Source: publisher figshare collection journal article supplement (https://geolsoc.figshare.com/ndownloader/files/8826862)
Supplement: Supplementary file 1 [file 8826862]

## Sheet: Sheet1
Supplementary material Table S1. Location data for samples in Table 1.
Sample	Type	Location	Stratigraphic Position	Longitude	Latitude
85-72-2	Sill	Dawson Peak	Upper Buckley Fm	162 25.22 E	83 50.45 S
11-5-1	Sill	Mt. Bowers	Pre-Pagoda Sst	163 57.60 E	85 01.50 S
96-73-16	Sill	Bennet Platform	Lower Buckley Fm	177 49.58 W	85 11.24 S
85-51-20	Lava	Mt Bumstead	238 m from base	174 12.80 E	85 39.15 S
85-51-41	Lava	Mt Bumstead	Uppermost Lava	174 12.80 E	85 39.15 S
04-01-01	Sill	Bull Pass	Basement Sill	161 52.66 E	77 30.28 S
02-09-58	Sill	Friis Hills	Peneplain Sill	161 31.39 E	77 45.64 S
02-11-64	Sill	East Beacon	Beacon Hgts Orthqtz	160 52.97 E	77 49.87 S
90-75-5	Lava	Carapace Nunatak	35 m from base	159 24.07 E	76 53.26 S
97-62-12	Sill	Thumb Point	Victoria Gp ?	160 28.47 E	75 57.99 S
97-68-3	Sill	Richards Nunatak	Victoria Gp ?	159 44.75 E	75 57.04 S
97-57-2	Sill	Shultz Peak	Victoria Gp ?	160 54.50 E	76 10.79 S
97-51-6	Lava	Brimstone Peak	52 m from base	158 29.53 E	75 47.60 S
97-51-52	Lava	Brimstone Peak	Uppermost Lava	158 29.53 E	75 47.60 S
82-9-2	Sill	Exposure Hill	Exposure Hill Fm	162 39.69 E	73 32.40 S
82-10-2	Sill	Exposure Hill	Exposure Hill Fm	162 39.69 E	73 32.40 S
81-2-30	Lava	Siders Bluff	314 m from base	162 39.08 E	73 13.54 S
S82-2-5	Lava	Haban Spur	Uppermost Lava	162 58.80 E	73 18.07 S
